# Supplementary material
Source: HighWire-hosted journal article supplement (https://bmjopen.bmj.com/content/13/10/e073575)
Supplement: inline-supplementary-material-1 [file inline-supplementary-material-1.pdf]

## APPENDIX A

## WHO Trial Registration dataset

| Data category                                 | Information                                                                                                                                                                                                                                                                                                                                                                                                                                                                                                                                                                                                             |
|-----------------------------------------------|-------------------------------------------------------------------------------------------------------------------------------------------------------------------------------------------------------------------------------------------------------------------------------------------------------------------------------------------------------------------------------------------------------------------------------------------------------------------------------------------------------------------------------------------------------------------------------------------------------------------------|
| Primary registry and trial identifying number | ClinicalTrials.gov. Identifier NCT05700981.                                                                                                                                                                                                                                                                                                                                                                                                                                                                                                                                                                             |
| Date of registration in primary registry      | 17 January, 2023                                                                                                                                                                                                                                                                                                                                                                                                                                                                                                                                                                                                        |
| Secondary identifying numbers                 | S-20210127, 22/43235                                                                                                                                                                                                                                                                                                                                                                                                                                                                                                                                                                                                    |
| Source(s) of monetary or material support     | The Centre for Clinical Implementation of Capsule Endoscopy (CICA)                                                                                                                                                                                                                                                                                                                                                                                                                                                                                                                                                      |
| Primary sponsor                               | The Centre for Clinical Implementation of Capsule Endoscopy (CICA)                                                                                                                                                                                                                                                                                                                                                                                                                                                                                                                                                      |
| Contact for public queries                    | TBM [Thomas.bjoersum-meyer@rsyd.dk]                                                                                                                                                                                                                                                                                                                                                                                                                                                                                                                                                                                     |
| Contact for scientific queries                | TBM [Thomas.bjoersum-meyer@rsyd.dk]<br>Odense University Hospital, Department of Surgery                                                                                                                                                                                                                                                                                                                                                                                                                                                                                                                                |
| Public title                                  | Sammenligning af kamerakapselundersøgelse og kikkertundersøgelse efter tilfælde med betændelse ved udposninger på tyktarm.                                                                                                                                                                                                                                                                                                                                                                                                                                                                                              |
| Scientific title                              | Colon capsule endoscopy compared to conventional colonoscopy in patients with colonic diverticulitis: a randomised controlled superiority trial (CACODI trial)                                                                                                                                                                                                                                                                                                                                                                                                                                                          |
| Countries of recruitment                      | Denmark                                                                                                                                                                                                                                                                                                                                                                                                                                                                                                                                                                                                                 |
| Health condition(s) or problem(s) studied     | Diverticulitis, patient satisfaction, colorectal neoplasia                                                                                                                                                                                                                                                                                                                                                                                                                                                                                                                                                              |
| Intervention(s)                               | Intervention group: colon capsule endoscopy<br>Comparison group: colonoscopy                                                                                                                                                                                                                                                                                                                                                                                                                                                                                                                                            |
| Key inclusion and exclusion criteria          | Ages eligible for study: $\geq 18$ years<br>Sexes eligible for study: both<br>Accepts healthy volunteers: no<br>Inclusion criteria: adult patient ( $\geq 18$ years), in-hospital CT-verified diverticulitis.<br>Exclusion criteria: Imaging of the colonic mucosa within the last 12 months and, colonic CT findings that require biopsy (suspected cancer) or polyp removal, CT-verified stenosis in the gastrointestinal tract, cardiac pacemaker, renal insufficiency, pregnancy/breastfeeding, allergies towards active substances administered in the trial, unable to provide oral and written informed consent. |
| Study type                                    | Interventional<br>Single-centre randomised, controlled trial                                                                                                                                                                                                                                                                                                                                                                                                                                                                                                                                                            |
| Date of first enrolment                       | February 2023                                                                                                                                                                                                                                                                                                                                                                                                                                                                                                                                                                                                           |
| Target sample size                            | 120                                                                                                                                                                                                                                                                                                                                                                                                                                                                                                                                                                                                                     |
| Recruitment status                            | Recruiting                                                                                                                                                                                                                                                                                                                                                                                                                                                                                                                                                                                                              |
| Primary outcome(s)                            | Comparison of colonoscopy and colon capsule endoscopy regarding patient satisfaction and tolerance during the bowel preparation, during the diagnostic procedure and 4 weeks after the procedure.                                                                                                                                                                                                                                                                                                                                                                                                                       |
| Key secondary outcomes                        | Comparison of colonoscopy and colon capsule endoscopy regarding completion rate of investigations, the prevalence of diverticula, polyps, cancers and other abnormal findings. Reporting of the number of patients referred to a subsequent colonoscopy after colon capsule endoscopy.                                                                                                                                                                                                                                                                                                                                  |
| Protocol version and date                     | Protocol version no. 2, approval date 7 October 2021                                                                                                                                                                                                                                                                                                                                                                                                                                                                                                                                                                    |
